# Supplementary material
Source: Springer Nature journal article supplement (https://www.springermedizin.de/resource/supplementary/12943_2014_1385_MOESM1_ESM.pdf/9552860)
Supplement: MOESM1 [file 9552860]

Figure S1

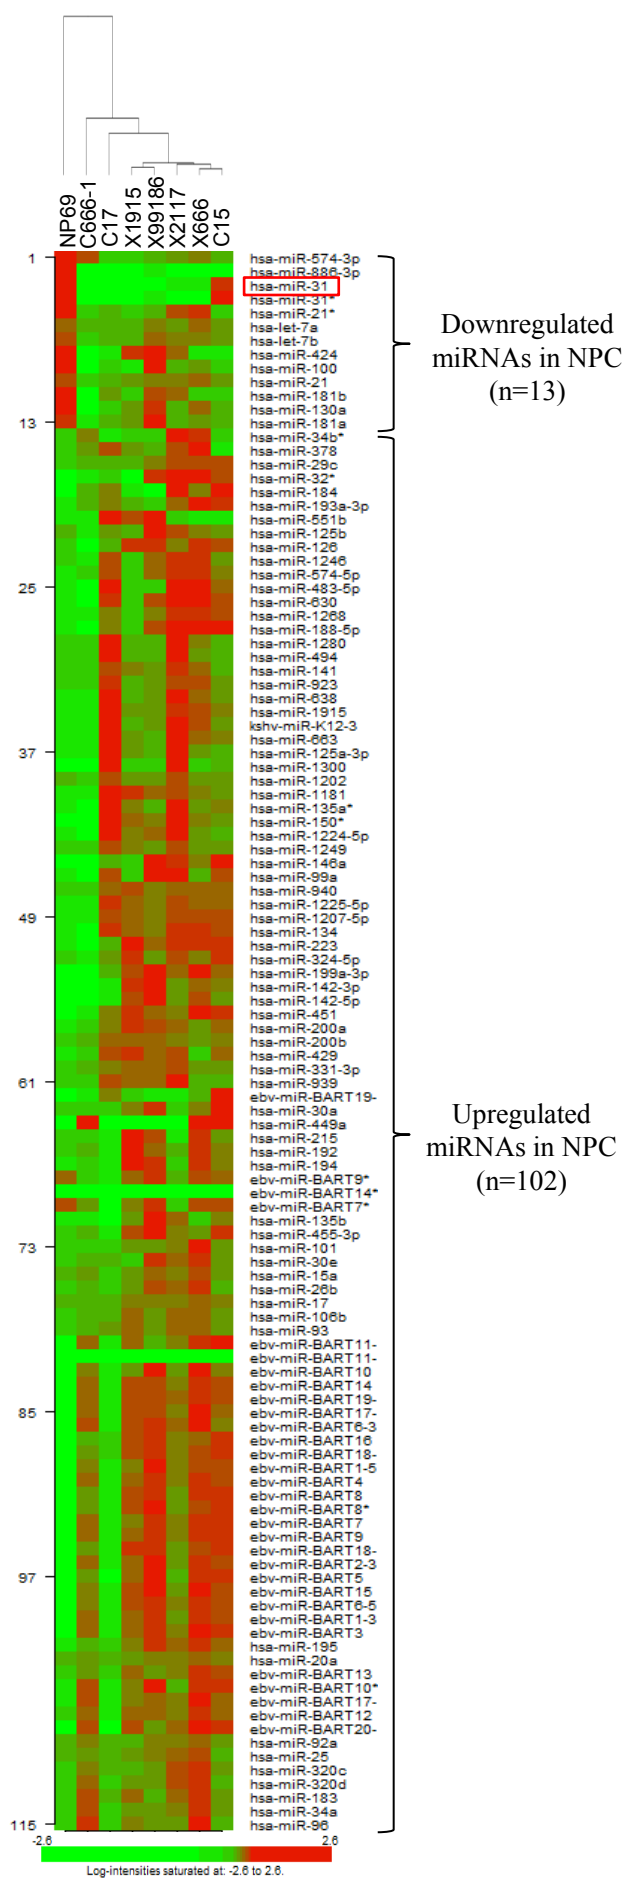

Downregulated  
miRNAs in NPC  
(n=13)

Upregulated  
miRNAs in NPC  
(n=102)
